# Supplementary material for: How Elite Athletes with a Spinal Cord Injury Sweat during Exercise—An Exploratory Study
Source: MDPI journal article supplement (doi:10.3390/sports12030081), 2024-03-14

## Supplementary Materials

**Table S1: STROBE checklist of items that should be included in reports of cross-sectional studies.**

|                              | Item No | Recommendation                                                                                                                                                                                      | Page No |
|------------------------------|---------|-----------------------------------------------------------------------------------------------------------------------------------------------------------------------------------------------------|---------|
| Title and abstract           | 1       | (a) Indicate the study’s design with a commonly used term in the title or the abstract                                                                                                              | 1       |
|                              |         | (b) Provide in the abstract an informative and balanced summary of what was done and what was found                                                                                                 | 1       |
| Introduction                 |         |                                                                                                                                                                                                     |         |
| Background/<br>rationale     | 2       | Explain the scientific background and rationale for the investigation being reported                                                                                                                | 1-2     |
| Objectives                   | 3       | State specific objectives, including any prespecified hypotheses                                                                                                                                    | 1-2     |
| Methods                      |         |                                                                                                                                                                                                     |         |
| Study design                 | 4       | Present key elements of study design early in the paper                                                                                                                                             | 1-2     |
| Setting                      | 5       | Describe the setting, locations, and relevant dates, including periods of recruitment, exposure, follow-up, and data collection                                                                     | 2       |
| Participants                 | 6       | (a) Give the eligibility criteria, and the sources and methods of selection of participants. Describe methods of follow-up                                                                          | 2       |
| Variables                    | 7       | Clearly define all outcomes, exposures, predictors, potential confounders, and effect modifiers. Give diagnostic criteria, if applicable                                                            | 2-3     |
| Data sources/<br>measurement | 8       | For each variable of interest, give sources of data and details of methods of assessment (measurement). Describe comparability of assessment methods if there is more than one group                | 2-3     |
| Bias                         | 9       | Describe any efforts to address potential sources of bias                                                                                                                                           | 2-3     |
| Study size                   | 10      | Explain how the study size was arrived at                                                                                                                                                           | 2       |
| Quantitative variables       | 11      | Explain how quantitative variables were handled in the analyses. If applicable, describe which groupings were chosen and why                                                                        | 2-3     |
| Statistical methods          | 12      | (a) Describe all statistical methods, including those used to control for confounding                                                                                                               | 2-3     |
|                              |         | (b) Describe any methods used to examine subgroups and interactions                                                                                                                                 | 2-3     |
|                              |         | (c) Explain how missing data were addressed                                                                                                                                                         | 3       |
|                              |         | (d) If applicable, explain how loss to follow-up was addressed                                                                                                                                      | n.a.    |
|                              |         | (e) Describe any sensitivity analyses                                                                                                                                                               | n.a.    |
| Results                      |         |                                                                                                                                                                                                     |         |
| Participants                 | 13      | (a) Report numbers of individuals at each stage of study—e.g. numbers potentially eligible, examined for eligibility, confirmed eligible, included in the study, completing follow-up, and analyzed | 3-4     |
|                              |         | (b) Give reasons for non-participation at each stage                                                                                                                                                | n.a.    |
|                              |         | (c) Consider use of a flow diagram                                                                                                                                                                  | n.a.    |
| Descriptive data             | 14      | (a) Give characteristics of study participants (e.g. demographic, clinical, social) and information on exposures and potential confounders                                                          | 3-4     |
|                              |         | (b) Indicate number of participants with missing data for each variable of interest                                                                                                                 | 4       |

|                          |    |                                                                                                                                                                                                                |      |
|--------------------------|----|----------------------------------------------------------------------------------------------------------------------------------------------------------------------------------------------------------------|------|
|                          |    | (c) Summarize follow-up time (e.g., average and total amount)                                                                                                                                                  | n.a. |
| Outcome data             | 15 | Report numbers of outcome events or summary measures over time                                                                                                                                                 | 3-7  |
| Main results             | 16 | (a) Give unadjusted estimates and, if applicable, confounder-adjusted estimates and their precision (e.g., 95% confidence interval). Make clear which confounders were adjusted for and why they were included | 3-7  |
|                          |    | (b) Report category boundaries when continuous variables were categorized                                                                                                                                      | 3-7  |
|                          |    | (c) If relevant, consider translating estimates of relative risk into absolute risk for a meaningful time period                                                                                               | n.a. |
| Other analyses           | 17 | Report other analyses done—e.g. analyses of subgroups and interactions, and sensitivity analyses                                                                                                               | 3-7  |
| <b>Discussion</b>        |    |                                                                                                                                                                                                                |      |
| Key results              | 18 | Summarize key results with reference to study objectives                                                                                                                                                       | 7-9  |
| Limitations              | 19 | Discuss limitations of the study, taking into account sources of potential bias or imprecision. Discuss both direction and magnitude of any potential bias                                                     | 7-9  |
| Interpretation           | 20 | Give a cautious overall interpretation of results considering objectives, limitations, multiplicity of analyses, results from similar studies, and other relevant evidence                                     | 7-9  |
| Generalizability         | 21 | Discuss the generalizability (external validity) of the study results                                                                                                                                          | 7-9  |
| <b>Other information</b> |    |                                                                                                                                                                                                                |      |
| Funding                  | 22 | Give the source of funding and the role of the funders for the present study and, if applicable, for the original study on which the present article is based                                                  | 9    |

**Table S2: Core and skin temperature as measured using a wearable sensor.**

|                | <b>Core temperature (°C)<br/>(n=15)</b> | <b>Skin temperature at<br/>the chest (°C) (n=15)</b> | <b>Skin temperature at<br/>the shin (°C) (n=7)</b> |
|----------------|-----------------------------------------|------------------------------------------------------|----------------------------------------------------|
| <b>Average</b> | 37.8 (37.4-38.0)                        | 34.2 (33.0-35.0)                                     | 25.4 (24.7-31.0)                                   |
| <b>Minimum</b> | 37.0 (36.8-37.2)                        | 33.2 (31.1-34.6)                                     | 24.6 (23.7-29.1)                                   |
| <b>Maximum</b> | 38.6 (37.7-38.9)                        | 35.2 (34.2-35.8)                                     | 26.2 (25.0-32.9)                                   |

Data are presented as median (Q1-Q3).

**Figure S1: Overview of the location of the absorbent patches for sweat collection (A), and sensors for heart rate (B) and core temperature measurements (C).**

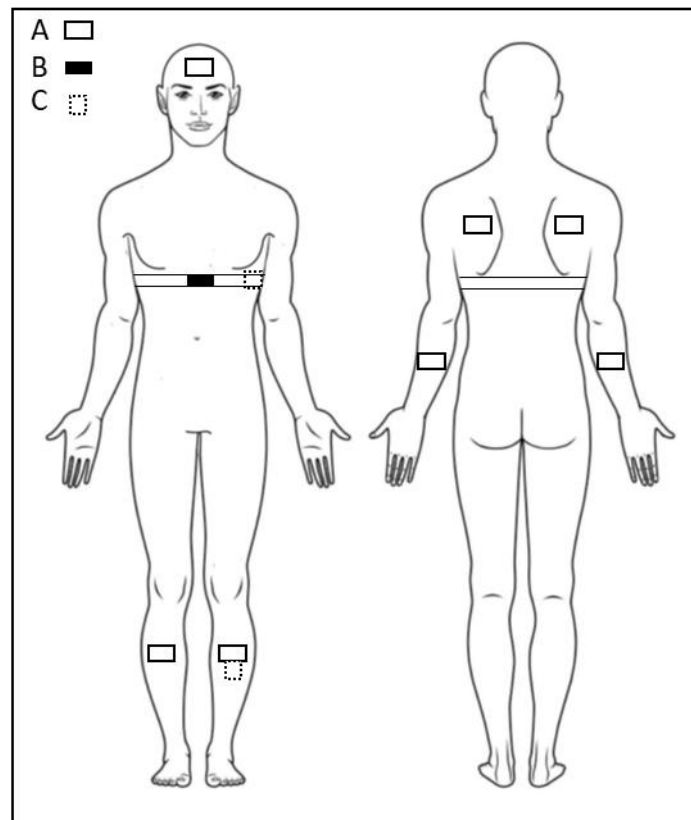

**Figure S2: Scatter plots for sweat rate versus A) average heart rate ( $r_s = 0.61$ ,  $p = 0.021$ ) and B) sodium concentration at the left scapula versus ( $r_s = 0.79$ ,  $p = 0.006$ ).**

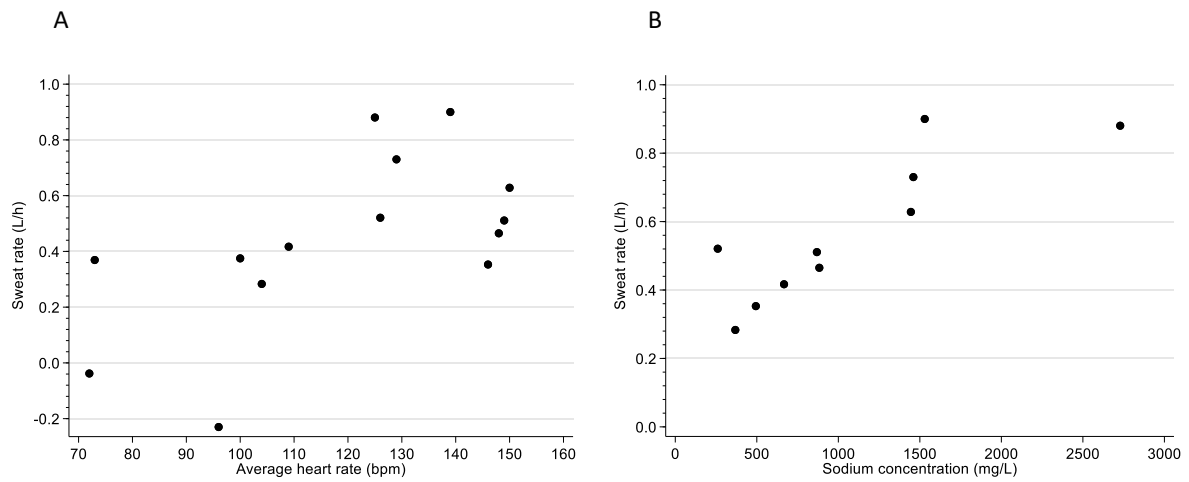

Supplement: s1 [file s1]
